# Supplementary material for: A Real-World Data Analysis of Adverse Drug Reactions Associated with Neuroprotective Agents: Insights from WHO-VigiAccess
Source: Research Square preprint supplement (doi:10.21203/rs.3.rs-7400659/v1), 2025-10-16
Supplement: Supplementary file 1 [file 03a9876afb8d3ee28a2a703f.docx]

Supplementary Material S1: Detailed Statistical Methods

S1.1 Disproportionality Analysis Formulas

1.Reporting Odds Ratio (ROR):

Definitions:

a: Number of reports associating the target drug with a specific adverse drug reaction (ADR).

b: Number of reports associating the target drug with all other ADRs.

c: Number of reports associating all other drugs with the specific ADR.

d: Number of reports associating all other drugs with all other ADRs.

Interpretation:

An ROR > 1 indicates a higher likelihood of the ADR being reported for the target drug compared to other drugs.

A signal is considered statistically significant if the lower bound of the 95% confidence interval (CI) exceeds 1.0.

1. Proportional Reporting Ratio (PRR):

Threshold Criteria:

A signal is flagged if all three conditions are met:

①a≥3 (minimum case threshold).

②PRR ≥ 2 (threshold for disproportionate reporting).

③Chi-squared statistic ≥ 4 (threshold for statistical significance).

S1.2 Principal Component Analysis (PCA)

Objective: Reduce dimensionality of ADR data to identify dominant patterns.

Procedure:

Standardize the ADR frequency matrix (z-score normalization).

Compute covariance matrix.

Extract eigenvalues and eigenvectors.

Retain the first two principal components (PC1 and PC2), explaining ​78% cumulative variance (PC1: 52%, PC2: 26%).

Outcome:

Drugs are visualized in a 2D space based on PC1 and PC2 scores.

S1.3 K-means Clustering

Objective: Classify drugs into safety clusters based on ADR patterns.

Parameters:

​Distance metric: Euclidean distance.

​Cluster number (k): Determined via the elbow method, which identified k=2 as optimal (minimizing within-cluster variance).

​Initialization: Random centroid seeding with 10 iterations to ensure stability.

Outcome:

Cluster 1: High-risk drugs (Cerebrolysin, Citicoline).

Cluster 2: Moderate-risk drugs (Flunarizine, Mecobalamin).

​S1.4 Signal Detection Criteria

A signal is validated if:

​Case count: a≥5 (ensuring robustness against rare events).

​Statistical significance:

ROR: 95% CI excluding 1.0.

PRR: Chi-squared ≥ 4 (p<0.05).

​Clinical relevance: ADR listed in drug labeling or supported by prior literature.
